# Supplementary material
Source: PubMed Central journal article supplement (PMC1838752)

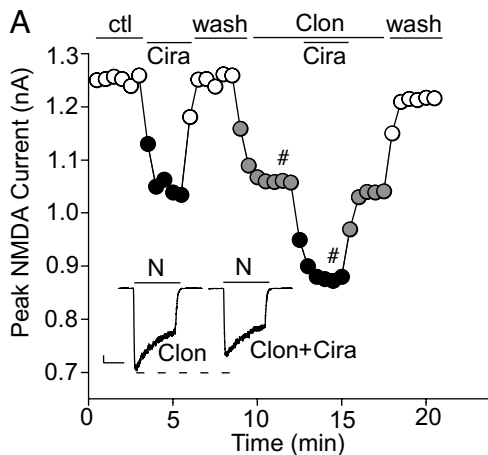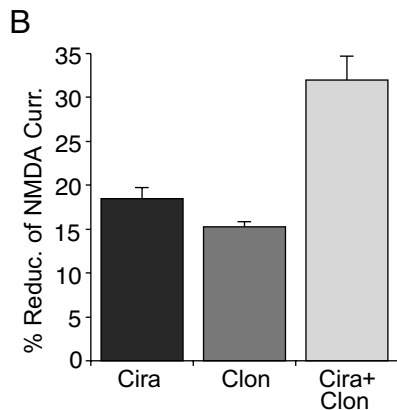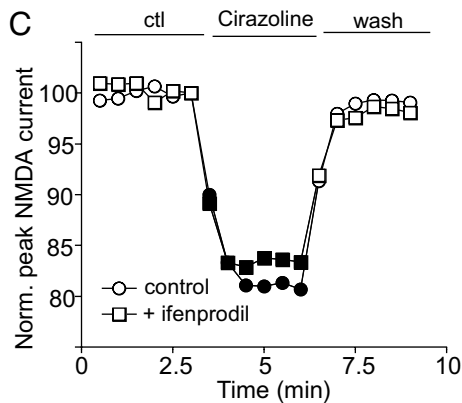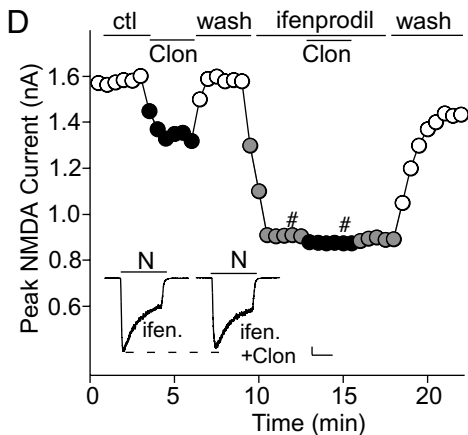

Supplement: pnas_0604560103_1.pdf [file pnas_0604560103_1.pdf]

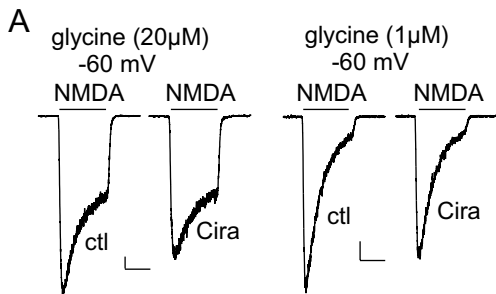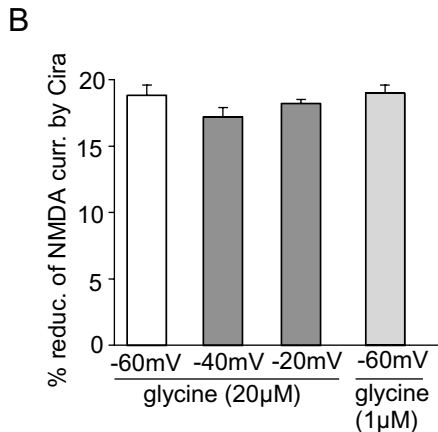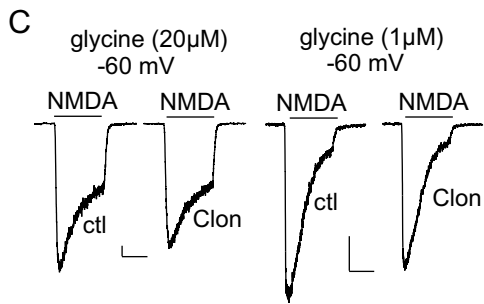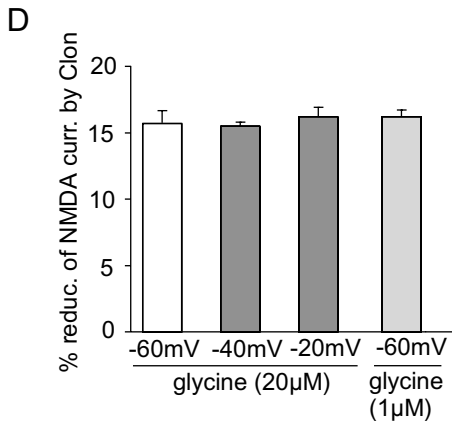

Supplement: pnas_0604560103_2.pdf [file pnas_0604560103_2.pdf]

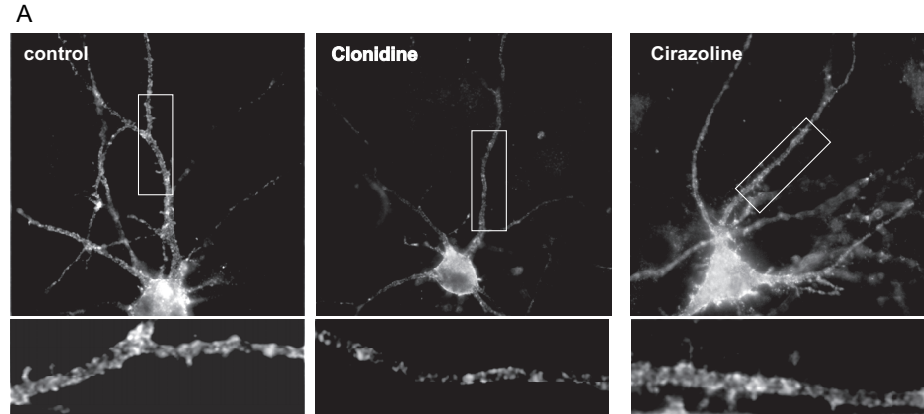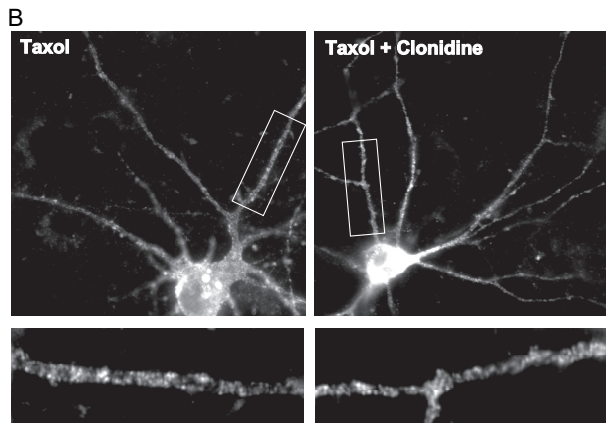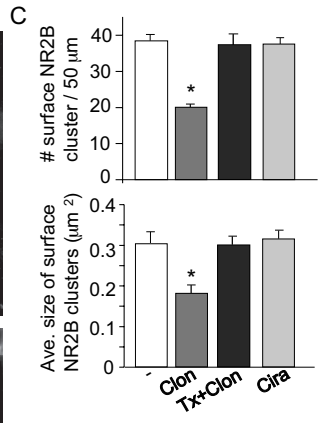

Supplement: pnas_0604560103_3.pdf [file pnas_0604560103_3.pdf]
